# Supplementary material for: OncogenicPIK3CAMutation and Dysregulation in Human Salivary Duct Carcinoma
Source: Hindawi journal article supplement (doi:10.1155/2014/810487), 2014-01-01

**Figure S1.**

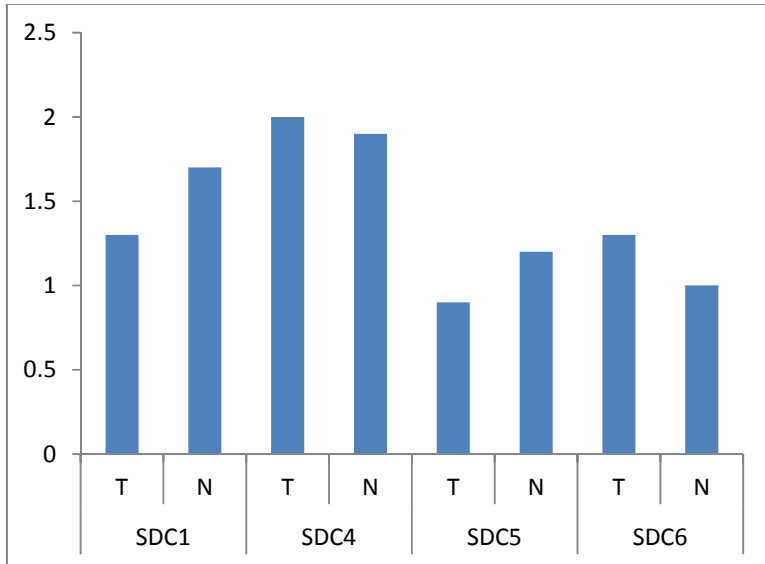

Supplement: f1 [file 810487.f1.pdf]
